# Supplementary material
Source: PubMed Central journal article supplement (PMC3998671)
Supplement: NIHMS571271-supplement-Bone_mean_volumes.pdf [file NIHMS571271-supplement-Bone_mean_volumes.pdf]

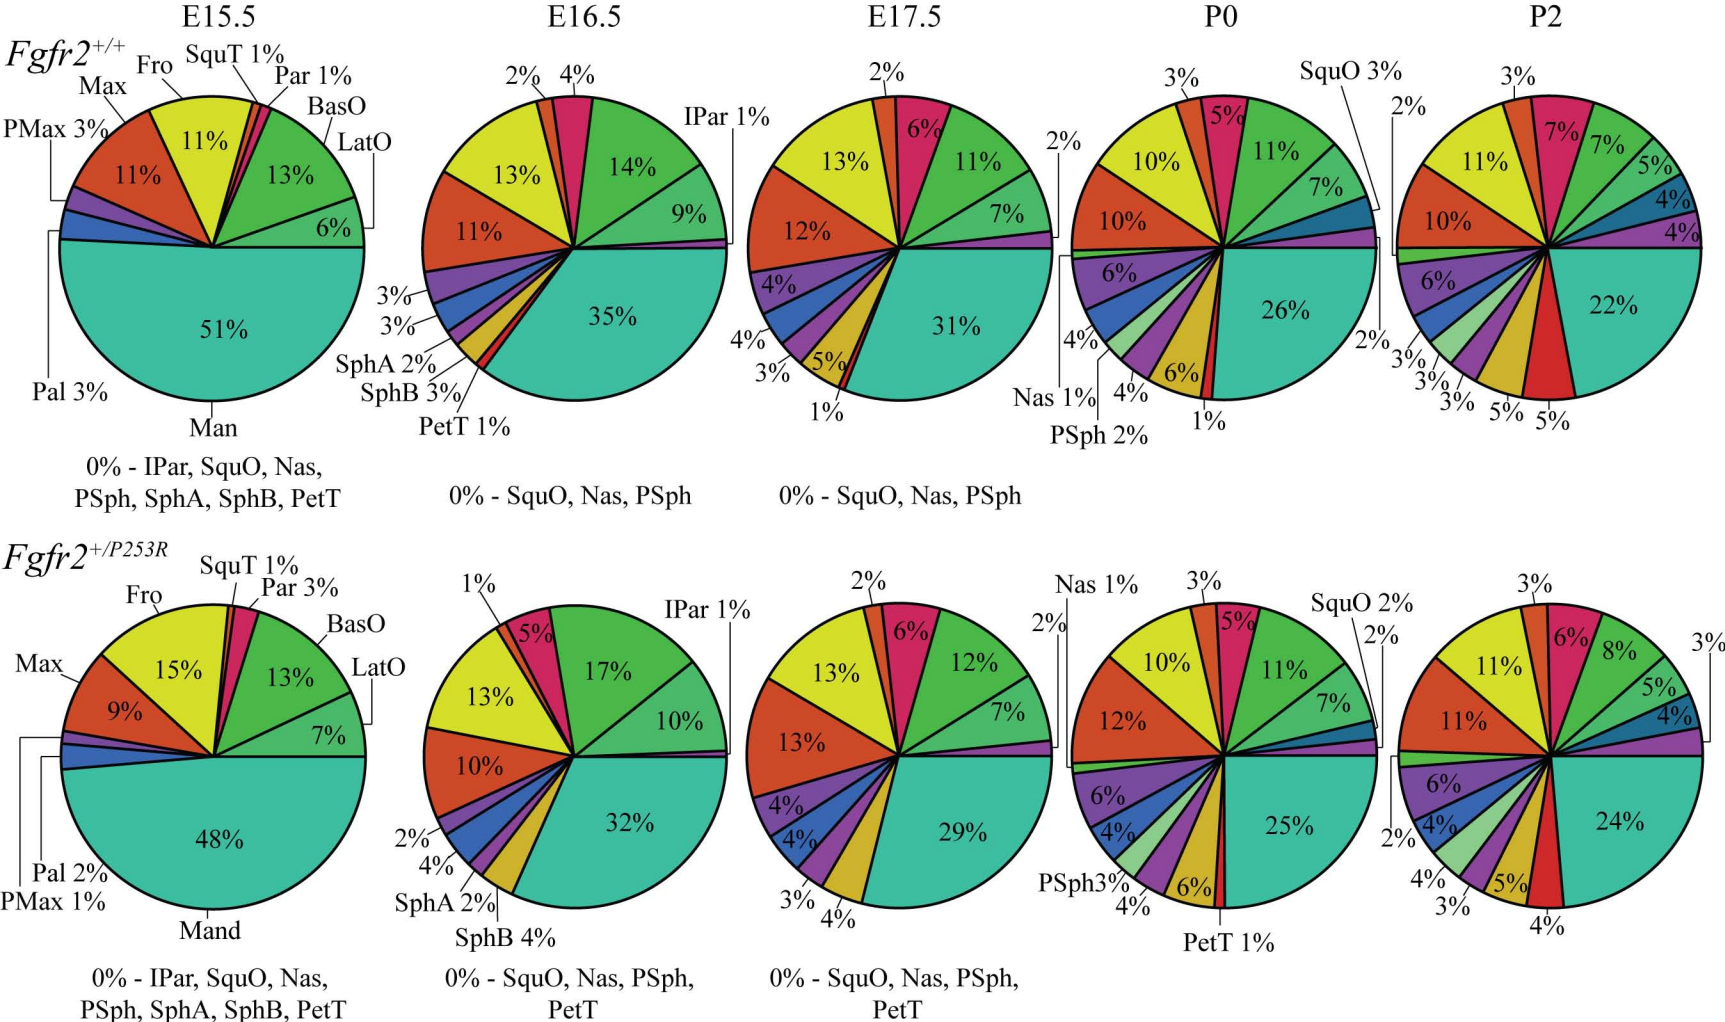

Pie charts illustrating the mean relative volume of each bone under analysis for *Fgfr2*<sup>+/P253R</sup> Apert model mice and unaffected littermates (*Fgfr2*<sup>+/+</sup>) across early ossification embryonic, as found in Table 1 of the associated paper. The differences in relative individual bone volume are stronger between ages than between genotypes within an age category. Percentage values are rounded. IPar: Interparietal, SquO: Squamous Occipital, LatO: Lateral Occipital, BasO: BasiOccipital, Par: Parietal, SquT: Squamous Temporal, Fro: Frontal, Max: Maxilla, Nas: Nasal, PMax: PreMaxilla, Pal: Palatine, PSph: PreSphenoid, SphA: Sphenoid Ala, SphB: Sphenoid Body, PetT: Petrous Temporal, Man: Mandible.
